# 1 **Quantification of Covid-19 Vaccine Coercion in India: A Survey Study**

2

3 **Authors:** Bhaskaran Raman<sup>1</sup>, Amitav Banerjee<sup>2</sup>, Sai Mahesh Vajjala<sup>2\*</sup>

4 1 Professor, Department of Computer Science and Engineering, Indian Institute of Technology  
5 Bombay, India

6 2 Professor, Department of Community Medicine, Dr. D.Y.Patil Vidyapeeth, Dr. D.Y. Patil  
7 Medical College Hospital and Research Center, Pimpri, Pune, India

8 2\* Postgraduate resident, Department of Community Medicine, Dr. D.Y.Patil Vidyapeeth, Dr. D.Y.  
9 Patil Medical College Hospital and Research Center, Pimpri, Pune, India

10 Address for correspondence: Dr. Sai Mahesh Vajjala, A-22, PG Boys Hostel 3, Dr. D.Y. Patil  
11 Medical College Campus, Sant Tukaram Nagar, Pimpri, Pune, Maharashtra, India. PIN:411018  
12 Contact: +91 7893614250, [vmahesh98@gmail.com]

13

14

## 15 **Abstract**

16 **Introduction:** Informed consent is the cornerstone of medical ethics, enshrined in the constitution  
17 of most countries, as well as in international documents. However, mandates for Covid-19  
18 vaccination as well as coercion was prevalent in many places in the world, including in India.  
19 Against this background, we did a cross sectional study to assess and quantify the extent of Covid-  
20 19 vaccine coercion in India.

21 **Methods:** A cross sectional study was conducted after obtaining ethical clearance from IIT  
22 Bombay. This survey was conducted using a pretested questionnaire anonymously amongst the  
23 college students and adults in Mumbai from October 2022 to December 2022. The questionnaire  
24 contained details of why the vaccine was taken, and if the participant was a student. Descriptive  
25 analysis was conducted and frequencies, percentages along with 95% confidence intervals were  
26 used to summarize the findings.

27 **Results:** A total of 483 participants responded, which included both students and non-students, of  
28 which 470 participants reported having taken the vaccine. A total of 106 (21.95%, 95% C.I. 18.48%  
29 -25.85%) reported to have pressured into taking the vaccine. The level of coercion was similar  
30 among college students 78 (21.61%, 95% C.I. 17.67%-26.14%) and non-student adults 28 (22.95%,  
31 95% C.I. 15.82% – 31.43%).

32 **Conclusion:** A significant proportion was coerced into taking the vaccines, violating the  
33 requirement for informed consent. These results are of paramount importance for future policies as  
34 well as for posterity.

## 35 **Introduction:**

36 Informed consent is of paramount importance in medical ethics. The right to one's health and  
37 bodily autonomy is guaranteed in Article-21 of the Indian constitution. Informed consent is also  
38 given unequivocal importance in the international UNESCO declaration of bioethics in the article 6.  
39 [1]. However, policies related to COVID-19 vaccine administration have been coercive in nature  
40 around the world, including in India. Covid-19 vaccine mandates for various aspects of day-to-day  
41 life were common in 2021 and early 2022. Few such examples in India are as follows, i) at  
42 workplace in Tamil Nadu state [2–4], ii) for accessing public transportation in Maharashtra state  
43 [5–7], iii) for accessing government services in Gujarat state [8–10], even the high court had upheld  
44 the decision of covid vaccine mandate by the Ahmedabad Municipal Commissioner in this case, iv)  
45 for entry into malls in Maharashtra state [6,7], v) for obtaining the ration from Public distribution  
46 System in the Madhya Pradesh state [11,12], vi) to enter educational institutions like colleges in  
47 Karnataka state [13,14] and vii) schools in the Chandigarh Union Territory [15].

48 On 02 May 2022, the Indian Supreme Court in the judgement of the case, “**Jacob Puliye vs**  
49 **Union of India**” in paragraph 3 of the conclusion, ruled that such coercion is disproportionate and  
50 violative of the Indian constitution, especially Article 21. [16,17] Further they opined that bodily  
51 integrity is protected under Article 21 of the Constitution and no individual can be forced to be  
52 vaccinated. [16,17] While the Hon'ble Supreme Court ruled on the unconstitutional nature of the  
53 mandates, various forms of mandates and coercion continued for some time.

54 We did a cross sectional study to ascertain the extent of this coercion. This study will be an  
55 important input in future policies, and also for historical record.

## 56 **Survey Methodology**

57 The survey sought to quantify the extent of Covid-19 vaccine coercion among students as well as  
58 non-student adults. Since the survey involved personal health information, it was designed to be  
59 anonymous: name or other identifying information was not collected or even asked during the  
60 survey. In the student category, only college students were considered, not school students. College  
61 students and adults who were willing to participate in the study were chosen as study participants.  
62 In order to obtain this sensitive information and to maintain confidentiality, the data was collected  
63 anonymously. After obtaining the Institutional Ethics Board approval, data collection was started.  
64 15 sessions were conducted on different dates between 26<sup>th</sup> October 2022 and 19<sup>th</sup> December  
65 2022 at two prominent sets of locations: within college campuses and outside. While the former  
66 primarily targeted the student category, the latter primarily targeted the non-student category.  
67 Within college campuses, various venues such as food court, hostel, classroom were considered.  
68 Outside of college campuses, various locations like bus-stops, markets, and local train stations were  
69 considered. All survey locations were in the city of Mumbai, Maharashtra, India.

70  
71 The following statement of informed consent was shown to a potential survey participant.  
72 ***Purpose of study:*** *Informed consent is of paramount importance. Several Covid-19 vaccine policies*  
73 *have been coercive, and there is even a Supreme Court ruling (02 May 2022) that such coercion is*  
74 *disproportionate and violative of the Indian constitution. This study seeks to measure the effect of*  
75 *the coercive policies, as it will be an important input in future policies, and also for historical*  
76 *record.*

77 *In this survey, you are asked 2 questions.*

78 *No personal information is collected or stored. The survey results will be summarized for*  
79 *students and non-students separately. It may be published, to improve understanding of past*

80 *policies. Please provide your answer to the above question after reading and understanding this*  
81 *consent and question form.*

82 The informed consent statement was shown in English as well as in Hindi and explained briefly  
83 to a potential participant. The response was collected from those who agreed to participate in the  
84 survey. The two questions asked. For simplicity, there was exactly one question of content asked in  
85 the survey: *Q1 What is the PRIMARY reason you took the Covid-19 vaccine?* The participant had to  
86 choose from among six choices: *A) Willingly, for own health; B) Willingly, for others' health; C)*  
87 *Pressured to take, for travel; D) Pressured to take, for education or work; E) Pressured, for some*  
88 *other reason; F) Not taken the vaccine.* The first two responses would be considered as willingly  
89 vaccinated while the latter three would be considered as vaccine coerced for analysis.

90 Since we wanted to separate the survey results by students versus non-students, an additional  
91 logistical question asked was: *Q2 Are you a college student? Yes or no as answer.*

92

93 **Sample size estimation:** To estimate an assumed proportion of 20% vaccine coercion among the  
94 college students and adults, at an acceptable error of 4% with alpha error at 5% and 80% power the  
95 minimum sample size required would be 385. The software used was WinPepi v11.65. However,  
96 we could collect a higher number of responses: 483 responses, of which 470 participants reported  
97 having taken the vaccine.

98 Data collected using both the techniques were entered into Microsoft Excel sheet and analyzed  
99 using Epi Info software developed by the Centers for Disease Control and Prevention. Descriptive  
100 statistics were applied. Frequency, percentages and 95% Confidence Intervals were used to  
101 summarise the collected data.

102 **Institute Ethics Committee (IEC) Approval:** This survey study was approved by the Institute  
103 Ethics Committee (IEC) of the Indian Institute of Technology Bombay (IITB), on 18 October 2022.  
104 Approval number: IITB-IEC/2022/026.

105

## 106 **Results:**

107 A total of 483 valid responses could be recorded. This consisted of 361 students and 122 non-  
108 student adults. Among which 13 participants did not take the vaccine. Further analysis showed that,  
109 for non-student adults, 28 (22.95%, 95% C.I. 15.82% - 31.43%) [Table 1] reported that the reason  
110 for taking the vaccine was pressure due to travel, education or others which was similar in college  
111 students as well where 78 (21.61%, 95% C.I. 17.67% - 26.14%) [Table 2] reported the same.  
112 Overall, 106 (21.95%, 95% C.I. 18.48% - 25.85%) [Table 3] reported that pressure as a reason for  
113 taking the vaccine. Figure 1 and Figure 2 summarize the survey results for non-students and  
114 students respectively. This clearly shows that a significant proportion of participants reported  
115 pressure as a reason for taking the vaccine. A small proportion of adults did not take vaccine in non-  
116 college adults, 5 (4.1%) which was lower than that among college students 8 (2.2%).

117

## 118 **Discussion and Conclusion**

119 A significant percentage of students as well as non-students, about 1 in 5, reported that they have  
120 been coerced into taking the Covid-19 vaccine. This is significant, especially given the Supreme  
121 Court ruling of the unconstitutionality of the vaccine mandates. The Government of India has  
122 claimed in its affidavit in another Supreme Court case that Covid-19 vaccination is voluntary [18].  
123 Although the vaccination was voluntary as per the union government, our survey finds that due to

124 various coercive policies on the ground, a large section of the population was pressured into taking  
125 the Covid-19 vaccines. This has important implications for future policies, as it concerns the issue  
126 of trust in public health.

127 The coercive policies for the college student population are especially significant, as data from  
128 the US as well as Europe shows that this age-group had no excess deaths in 2020 or 2021, due to  
129 Covid-19, a mortality rate of 0.03 per 1,00,000 in age group 0-19 years [19]. Even during the peak  
130 of August 2021 to September 2022, study from US revealed that COVID mortality was 0.6 per 100  
131 000 for those aged 1 to 4 years; 0.4 per 100 000 for those aged 5 to 9 years; 0.5 per 100 000 for  
132 those aged 10 to 14 years; and 1.8 per 100 000 for those aged 15 to 19 years. [20]

133 The survey study has been limited in scope, and it is difficult to extrapolate the results to other  
134 places such as rural regions. In other places, the level of coercion could have been lower or higher.  
135 The background details of the study participants were not taken which would provide more  
136 accuracy in the estimation. Qualitative studies on coercion can elaborate the understanding on  
137 vaccine coercion and would generate insights into the policy makers as well as healthcare givers.  
138 This observational descriptive study provides an insight into vaccine coercion and brings this into  
139 light which requires further studies to fill the lacunae and establish stronger evidence.

140

141

## 142 **References:**

- 143 1. Regine K. Universal Declaration on Bioethics and Human Rights [Internet]. 2009. 123–128  
144 p. Available from: <https://unesdoc.unesco.org/ark:/48223/pf0000179844>

- 145 2. Choudhary AA. Tamil Nadu digs up 1939 law, tells Supreme Court vaccination mandate is  
146 legal. 2022 Mar 22; Available from: [https://timesofindia.indiatimes.com/india/tamil-nadu-digs-](https://timesofindia.indiatimes.com/india/tamil-nadu-digs-up-1939-law-tells-supreme-court-vaccination-mandate-is-legal/articleshow/90362960.cms)  
147 [up-1939-law-tells-supreme-court-vaccination-mandate-is-legal/articleshow/90362960.cms](https://timesofindia.indiatimes.com/india/tamil-nadu-digs-up-1939-law-tells-supreme-court-vaccination-mandate-is-legal/articleshow/90362960.cms)
- 148 3. Tamil Nadu makes two vaccine doses must for industrial employees. 2021 Jul 25; Available  
149 from:  
150 [http://timesofindia.indiatimes.com/articleshow/84717185.cms?utm\\_source=contentofinterest&u](http://timesofindia.indiatimes.com/articleshow/84717185.cms?utm_source=contentofinterest&utm_medium=text&utm_campaign=cppst)  
151 [tm\\_medium=text&utm\\_campaign=cppst](http://timesofindia.indiatimes.com/articleshow/84717185.cms?utm_source=contentofinterest&utm_medium=text&utm_campaign=cppst)
- 152 4. Tamil Nadu Govt notifies, invokes Tamil Nadu Public Health Act, 1939 to prevent spread of  
153 COVID-19 infection. 2021 Nov 20; Available from:  
154 [https://newsonair.gov.in/News?title=Tamil-Nadu-Govt-notifies%2C-invokes-Tamil-Nadu-](https://newsonair.gov.in/News?title=Tamil-Nadu-Govt-notifies%2C-invokes-Tamil-Nadu-Public-Health-Act%2C-1939-to-prevent-spread-of-COVID-19-infection&id=429990)  
155 [Public-Health-Act%2C-1939-to-prevent-spread-of-COVID-19-infection&id=429990](https://newsonair.gov.in/News?title=Tamil-Nadu-Govt-notifies%2C-invokes-Tamil-Nadu-Public-Health-Act%2C-1939-to-prevent-spread-of-COVID-19-infection&id=429990)
- 156 5. Gangan S, MS E. Maharashtra, Mumbai issue steps to contain Omicron. 2021 Nov 28 [cited  
157 2023 Jun 26]; Available from: [https://www.hindustantimes.com/cities/mumbai-](https://www.hindustantimes.com/cities/mumbai-news/maharashtra-mumbai-issue-steps-to-contain-omicron-101638038939227.html)  
158 [news/maharashtra-mumbai-issue-steps-to-contain-omicron-101638038939227.html](https://www.hindustantimes.com/cities/mumbai-news/maharashtra-mumbai-issue-steps-to-contain-omicron-101638038939227.html)
- 159 6. Covid: Only fully vaccinated people allowed to use public transport in Maharashtra as new  
160 guidelines kick in [Internet]. 2021. Available from:  
161 [https://indianexpress.com/article/cities/mumbai/covid-vaccinated-allowed-public-transport-](https://indianexpress.com/article/cities/mumbai/covid-vaccinated-allowed-public-transport-maharashtra-7644998/)  
162 [maharashtra-7644998/](https://indianexpress.com/article/cities/mumbai/covid-vaccinated-allowed-public-transport-maharashtra-7644998/)
- 163 7. Maharashtra: Now, full vaccination must for all public transport, gatherings, services. 2021  
164 Nov 28; Available from:



165 [http://timesofindia.indiatimes.com/articleshow/87954967.cms?utm\\_source=contentofinterest&u](http://timesofindia.indiatimes.com/articleshow/87954967.cms?utm_source=contentofinterest&utm_medium=text&utm_campaign=cppst)  
166 [tm\\_medium=text&utm\\_campaign=cppst](http://timesofindia.indiatimes.com/articleshow/87954967.cms?utm_source=contentofinterest&utm_medium=text&utm_campaign=cppst)

167 8. Hazarika A. Gujarat High Court upholds compulsory vaccination policy of Ahmedabad  
168 Municipal Corporation [Internet]. 2021. Available from:

169 [https://www.barandbench.com/news/covid-19-gujarat-high-court-upholds-compulsory-](https://www.barandbench.com/news/covid-19-gujarat-high-court-upholds-compulsory-vaccination-policy-ahmedabad-municipal-corporation)  
170 [vaccination-policy-ahmedabad-municipal-corporation](https://www.barandbench.com/news/covid-19-gujarat-high-court-upholds-compulsory-vaccination-policy-ahmedabad-municipal-corporation)

171 9. Ahmedabad: AMC bans non-vaccinated people from entering private premises. Indian  
172 Express [Internet]. 2021 Nov 16; Available from:

173 [https://indianexpress.com/article/cities/ahmedabad/ahmedabad-amc-bans-non-vaccinated-](https://indianexpress.com/article/cities/ahmedabad/ahmedabad-amc-bans-non-vaccinated-people-from-entering-private-premises-7624676/)  
174 [people-from-entering-private-premises-7624676/](https://indianexpress.com/article/cities/ahmedabad/ahmedabad-amc-bans-non-vaccinated-people-from-entering-private-premises-7624676/)

175 10. Supreme Court rejects plea against Ahmedabad municipal commissioner's mandate for  
176 covid vaccination. 2022 Apr 5; Available from:

177 [https://timesofindia.indiatimes.com/city/ahmedabad/sc-rejects-plea-against-amcs-mandate-for-](https://timesofindia.indiatimes.com/city/ahmedabad/sc-rejects-plea-against-amcs-mandate-for-vaccination/articleshow/90651795.cms)  
178 [vaccination/articleshow/90651795.cms](https://timesofindia.indiatimes.com/city/ahmedabad/sc-rejects-plea-against-amcs-mandate-for-vaccination/articleshow/90651795.cms)

179 11. Singh A. Ration Linked to Covid Vaccination in Madhya Pradesh. 2021 Nov 10; Available  
180 from: [https://timesofindia.indiatimes.com/city/bhopal/ration-linked-to-covid-vaccination-in-](https://timesofindia.indiatimes.com/city/bhopal/ration-linked-to-covid-vaccination-in-madhya-pradesh/articleshow/87620581.cms)  
181 [madhya-pradesh/articleshow/87620581.cms](https://timesofindia.indiatimes.com/city/bhopal/ration-linked-to-covid-vaccination-in-madhya-pradesh/articleshow/87620581.cms)

182 12. Tomar S. Only fully vaccinated people to get ration from next year: Madhya Pradesh govt.  
183 2021 Nov 18; Available from: [https://www.hindustantimes.com/india-news/no-vaccination-no-](https://www.hindustantimes.com/india-news/no-vaccination-no-ration-says-mp-govt-s-order-in-bid-to-achieve-inoculation-target-101637148098733.html)  
184 [ration-says-mp-govt-s-order-in-bid-to-achieve-inoculation-target-101637148098733.html](https://www.hindustantimes.com/india-news/no-vaccination-no-ration-says-mp-govt-s-order-in-bid-to-achieve-inoculation-target-101637148098733.html)

- 185 13. In Karnataka, double vaccination a must for parents of children going to schools and  
186 colleges. The Hindu [Internet]. 2021 Dec 3; Available from:  
187 [https://www.thehindu.com/news/national/karnataka/two-doses-of-covid-19-vaccination-](https://www.thehindu.com/news/national/karnataka/two-doses-of-covid-19-vaccination-mandatory-for-parents-of-children-going-to-schools-colleges/article37822661.ece)  
188 [mandatory-for-parents-of-children-going-to-schools-colleges/article37822661.ece](https://www.thehindu.com/news/national/karnataka/two-doses-of-covid-19-vaccination-mandatory-for-parents-of-children-going-to-schools-colleges/article37822661.ece)
- 189 14. Karnataka HC: No student, staff can be allowed entry without vax dose. 2021 Dec 5;  
190 Available from:  
191 [http://timesofindia.indiatimes.com/articleshow/88098459.cms?utm\\_source=contentofinterest&u](http://timesofindia.indiatimes.com/articleshow/88098459.cms?utm_source=contentofinterest&utm_medium=text&utm_campaign=cppst)  
192 [tm\\_medium=text&utm\\_campaign=cppst](http://timesofindia.indiatimes.com/articleshow/88098459.cms?utm_source=contentofinterest&utm_medium=text&utm_campaign=cppst)
- 193 15. Unvaccinated children can attend offline classes in Chandigarh schools for now. Hindustan  
194 Times [Internet]. 2022 Mar 4; Available from:  
195 [https://www.hindustantimes.com/cities/chandigarh-news/unvaccinated-children-can-attend-](https://www.hindustantimes.com/cities/chandigarh-news/unvaccinated-children-can-attend-offline-classes-in-chandigarh-schools-for-now-101651610270065.html)  
196 [offline-classes-in-chandigarh-schools-for-now-101651610270065.html](https://www.hindustantimes.com/cities/chandigarh-news/unvaccinated-children-can-attend-offline-classes-in-chandigarh-schools-for-now-101651610270065.html)
- 197 16. SC: Cannot force vaccination, review vaccine mandate till infection rate low. Indian Express  
198 [Internet]. 2022 May 3; Available from: [https://indianexpress.com/article/india/supreme-court-](https://indianexpress.com/article/india/supreme-court-centre-covid-19-vaccine-policy-7897266/)  
199 [centre-covid-19-vaccine-policy-7897266/](https://indianexpress.com/article/india/supreme-court-centre-covid-19-vaccine-policy-7897266/)
- 200 17. Supreme Court of India Jacob Puliyl vs Union Of India on 2 May, 2022 [Internet]. 2022.  
201 Available from: <https://indiankanoon.org/doc/17990001/>
- 202 18. Thacker T. Taking a Covid-19 vaccine not binding on anyone: Govt tells SC [Internet]. The  
203 Economic Times. 2022. Available from:  
204 [https://economictimes.indiatimes.com/news/india/taking-a-covid-19-vaccine-not-binding-on-](https://economictimes.indiatimes.com/news/india/taking-a-covid-19-vaccine-not-binding-on-anyone-govt-tells-)  
205 [anyone-govt-tells-](https://economictimes.indiatimes.com/news/india/taking-a-covid-19-vaccine-not-binding-on-anyone-govt-tells-)

206 [sc/articleshow/95901389.cms?utm\\_source=contentofinterest&utm\\_medium=text&utm\\_campai](https://www.ncbi.nlm.nih.gov/pmc/articles/PMC95901389/)  
207 [gn=cppst](https://www.ncbi.nlm.nih.gov/pmc/articles/PMC95901389/)

208 19. Bhopal S, Bagaria J, Bhopal R. Children’s mortality from COVID-19 compared with all-  
209 deaths and other relevant causes of death: epidemiological information for decision-making by  
210 parents, teachers, clinicians and policymakers. *Public Health*. 2020 Aug;185:19–20.

211 20. Flaxman S, Whittaker C, Semenova E, Rashid T, Parks RM, Blenkinsop A, et al.  
212 Assessment of COVID-19 as the Underlying Cause of Death Among Children and Young  
213 People Aged 0 to 19 Years in the US. *JAMA Netw Open*. 2023 Jan 3;6(1):e2253590.

214

215

216

217 Supplementary file:

218 Contents:

219 i) **Table 1:** Responses from non-student adults

220 ii) **Table 2:** Responses from college students

221 iii) **Table 3:** Responses from total participants (students & non-students)

| <b>Survey response</b> | <b>Frequency</b> | <b>Percentage</b> | <b>95% confidence interval</b> |
|------------------------|------------------|-------------------|--------------------------------|
| Pressured into taking  | 28               | 22.95%            | 15.82% - 31.43%                |
| Willingly taken        | 89               | 72.95%            | 64.16% - 80.59%                |
| Not taken              | 5                | 4.10%             | 1.34% - 9.31%                  |
| Total                  | 122              | 100%              |                                |

222

223

224

| <b>Table 2: Responses from college students</b> |                  |                   |                                |
|-------------------------------------------------|------------------|-------------------|--------------------------------|
| <b>Survey response</b>                          | <b>Frequency</b> | <b>Percentage</b> | <b>95% confidence interval</b> |
| Pressured into taking                           | 78               | 21.61%            | 17.67% - 26.14%                |
| Willingly taken                                 | 275              | 76.18%            | 71.52% - 80.28%                |
| Not taken                                       | 8                | 2.22%             | 1.13% - 4.31%                  |
| Total                                           | 361              | 100%              |                                |

225

226

| <b>Table 3: Responses from total participants (students &amp; non-students)</b> |                  |                   |                                |
|---------------------------------------------------------------------------------|------------------|-------------------|--------------------------------|
| <b>Survey response</b>                                                          | <b>Frequency</b> | <b>Percentage</b> | <b>95% confidence interval</b> |
| Pressured into taking                                                           | 106              | 21.95%            | 18.48% - 25.85%                |
| Willingly taken                                                                 | 364              | 75.36%            | 71.33% - 79%                   |
| Not taken                                                                       | 13               | 2.69%             | 1.58% - 4.55%                  |
| Total                                                                           | 483              | 100%              |                                |

227

228

229

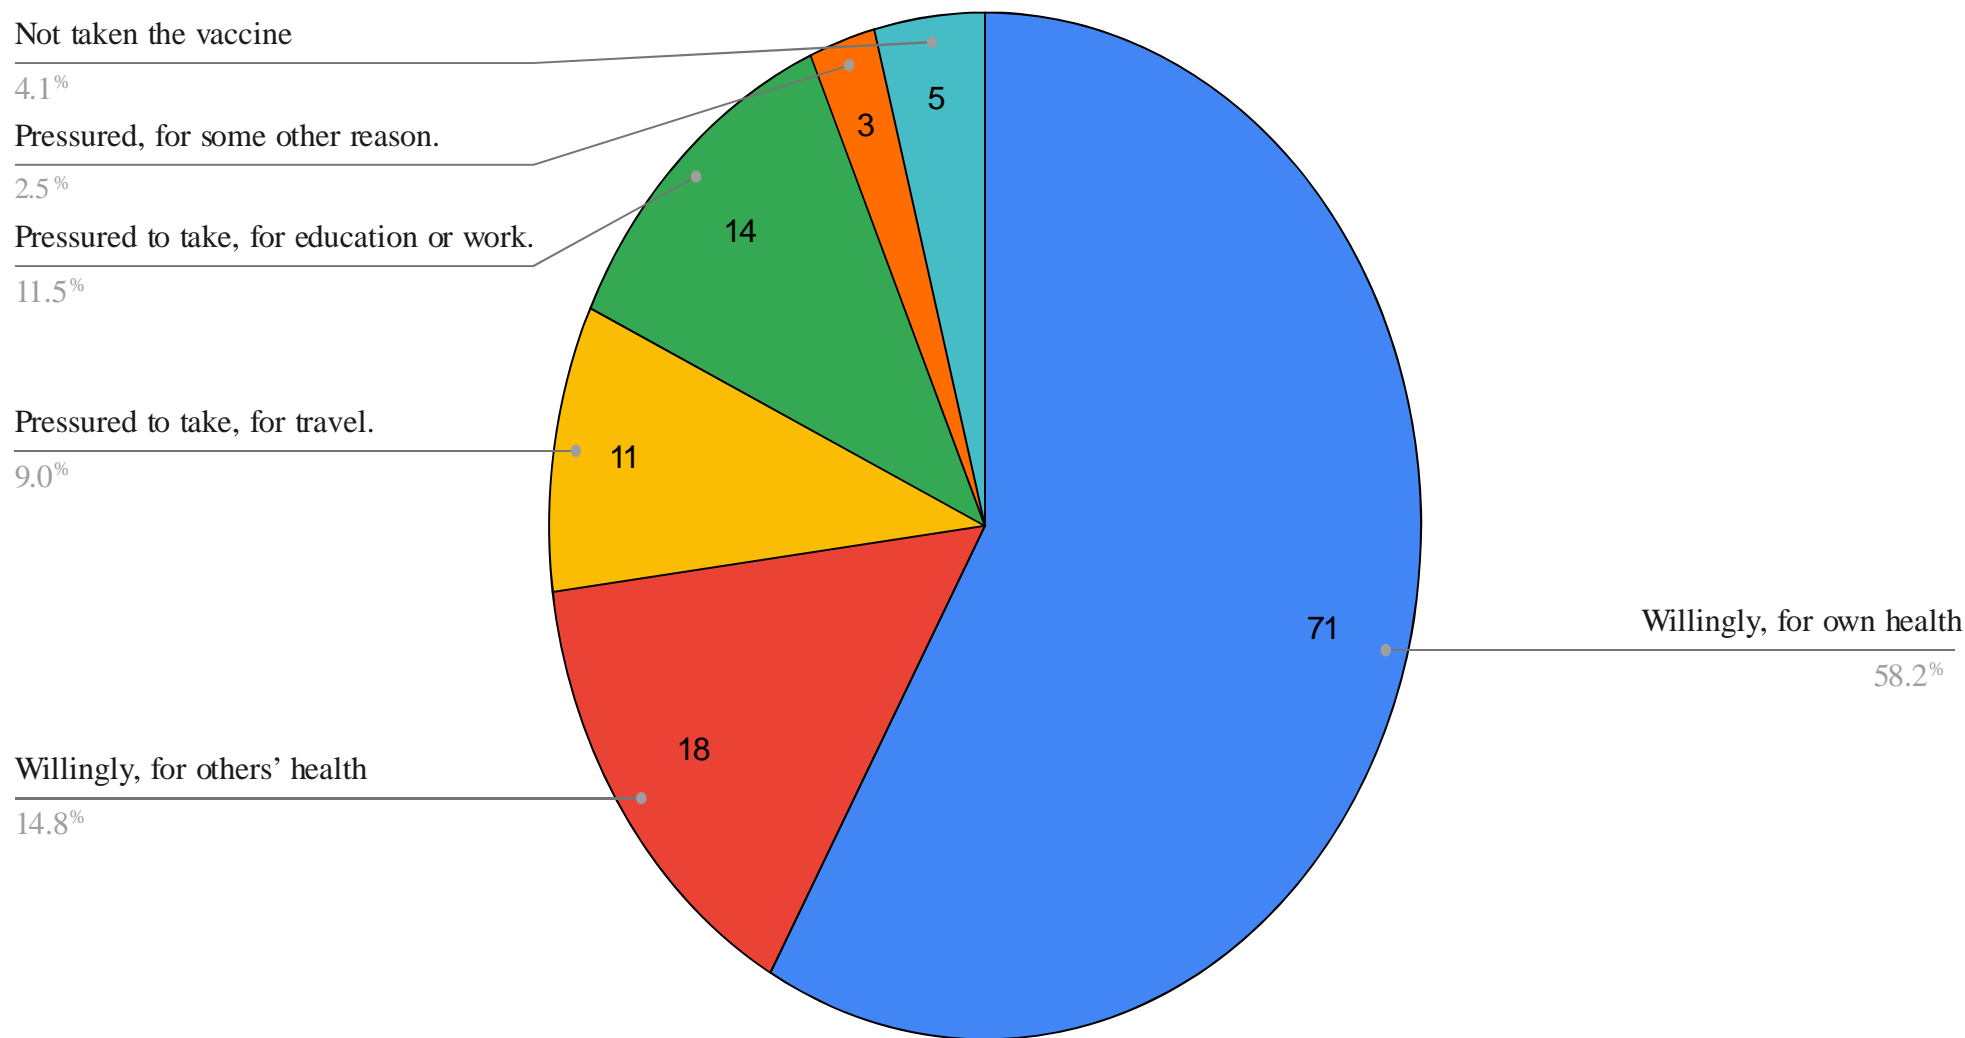

Figure 1: Pie chart of responses from non-students (total: 122)

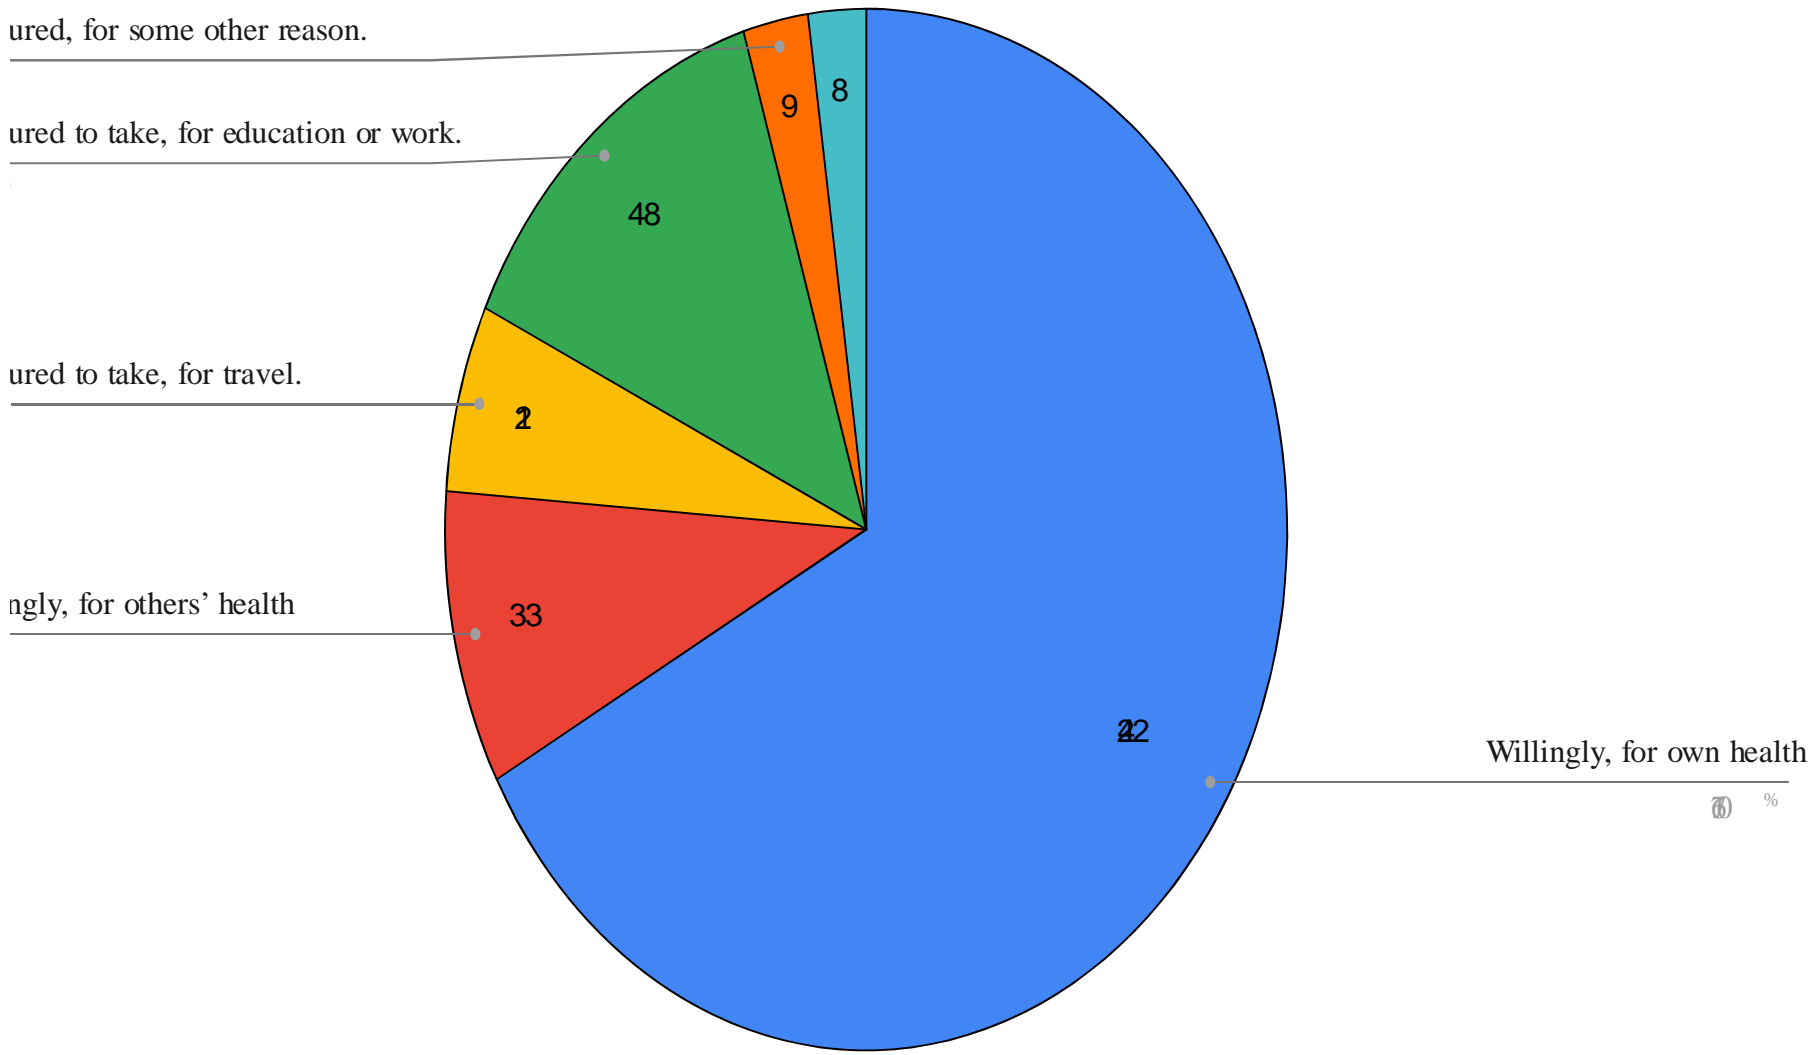

Figure 2: Pie chart of responses from students (total: 6)
